# Supplementary material
Source: PubMed Central journal article supplement (PMC4103262)
Supplement: Supp_Figure1.pdf [file Supp_Figure1.pdf]

## Supplementary Data

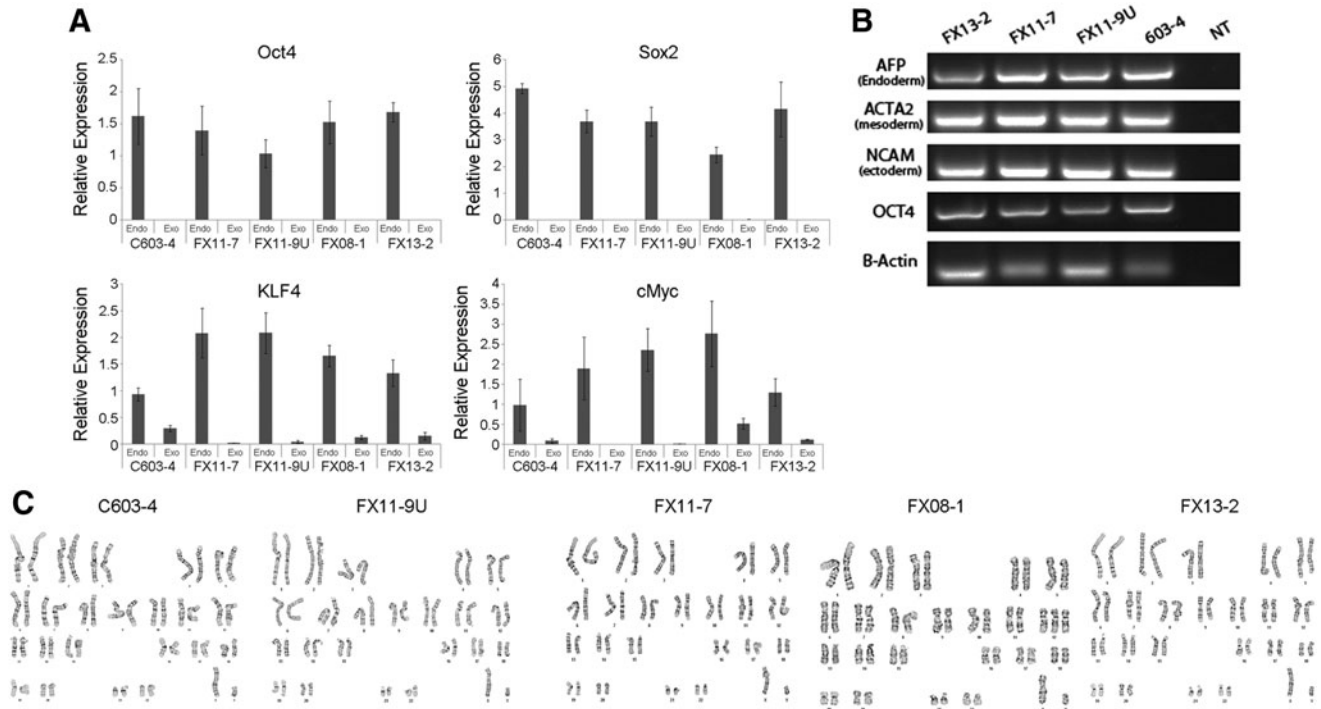

**SUPPLEMENTARY FIG. S1.** Characterization of fragile X syndrome (FXS) induced pluripotent stem cells (iPSCs) generated from FXS patient fibroblasts. **(A)** Quantitative reverse transcription–polymerase chain reaction (PCR) shows that iPSCs express endogenous pluripotency markers Oct4, Sox2, KLF4, and cMyc, but not their exogenous virally expressed counterparts. Relative expression normalized to WA09 human embryonic stem cells. Error bars = SE,  $n = 3$ . **(B)** Nondirected differentiation of iPSCs shows spontaneous expression of germ layer markers for endoderm (AFP), mesoderm (ACTA2), and ectoderm (NCAM) as assessed by RT-PCR. **(C)** Representative karyotypes of iPSC lines. iPSC line FX08-1 showed a percentage for cells with trisomy 12 (data not shown) so this line was not used for further analysis.
